# Supplementary material for: Oxygen self-supplying small size magnetic nanoenzymes for synergistic photodynamic and catalytic therapy of breast cancer
Source: Royal Society of Chemistry journal article supplement (doi:10.1039/d3nr05289c), 2024-01-01
Supplement: d3nr05289c1.pdf [file d3nr05289c1.pdf]

## Electronic Supplementary Information

# Oxygen Self-supplying Small Size Magnetic Nanoenzymes for Synergistic Photodynamic and Catalytic Therapy of Breast Cancer

Xinyi Cai <sup>a, †</sup>, Tiantian Xu <sup>b, †</sup>, Rui Ding <sup>a, †</sup>, Dou Zhang <sup>a</sup>, Guiquan Chen <sup>c</sup>, Wenchang Zhao <sup>a</sup>, Jiajie Hou <sup>e</sup>, Hong Pan <sup>b, \*</sup>, Qian Zhang <sup>d, \*</sup>, Ting Yin <sup>a, \*</sup>

---

<sup>a</sup> Dongguan Key Laboratory of Screening and Research of Anti-inflammatory Ingredients in Chinese Medicine, School of Pharmacy, Guangdong Medical University, Dongguan 523808, China

<sup>b</sup> Guangdong Key Laboratory of Nanomedicine, Shenzhen Institute of Advanced Technology, Chinese Academy of Sciences, Shenzhen 518055, China

<sup>c</sup> Department of Gastroenterology, the Tenth Affiliated Hospital of Southern Medical University (Dongguan People's Hospital), Dongguan 523000, China

<sup>d</sup> Institute of Nano Biomedicine and Engineering, School of Sensing Science and Engineering, School of Electronic Information and Electrical Engineering, Shanghai Jiao Tong University, 800 Dongchuan RD, Shanghai 200240, China.

<sup>e</sup> Cancer Centre, Faculty of Health Sciences, University of Macau, Macau SAR, China.

† These authors contributed equally to this work.

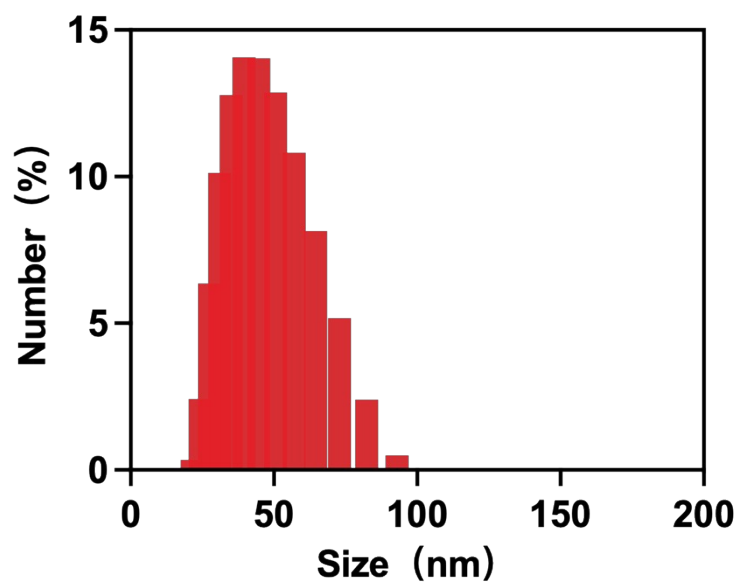

**Figure S1.** Size distribution of the Fe<sub>3</sub>O<sub>4</sub>-Hb@cur.

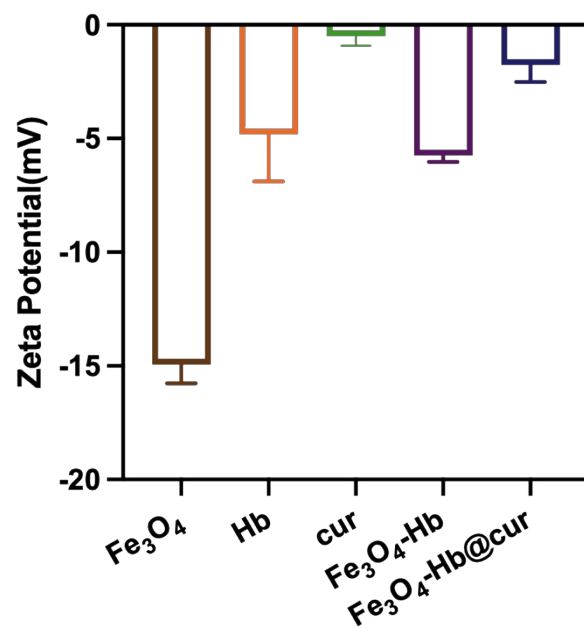

**Figure S2.** Zeta potential changes of different samples. Data are presented as mean  $\pm$  SD (n = 3).

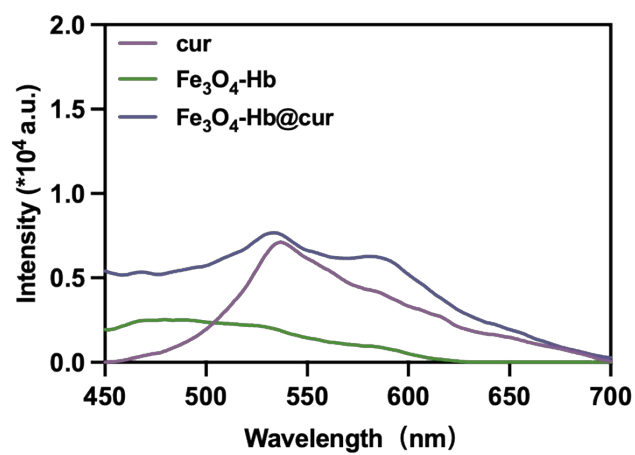

**Figure S3.** Fluorescence spectra of cur, Fe<sub>3</sub>O<sub>4</sub>-Hb@cur, and Fe<sub>3</sub>O<sub>4</sub>-Hb.

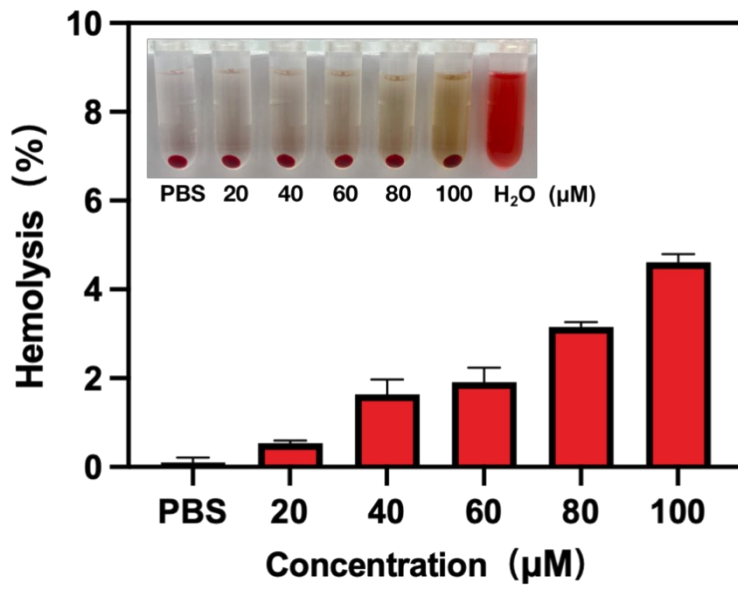

Figure S4. Hemolysis rates of Fe<sub>3</sub>O<sub>4</sub>-Hb@cur at different concentrations (0-100 μM).

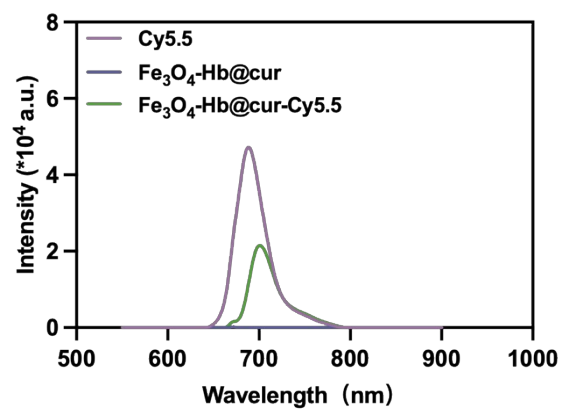

**Figure S5.** Fluorescence spectra of Cy5.5 、 Fe<sub>3</sub>O<sub>4</sub>-Hb@cur-Cy5.5 、 Fe<sub>3</sub>O<sub>4</sub>-Hb@cur.

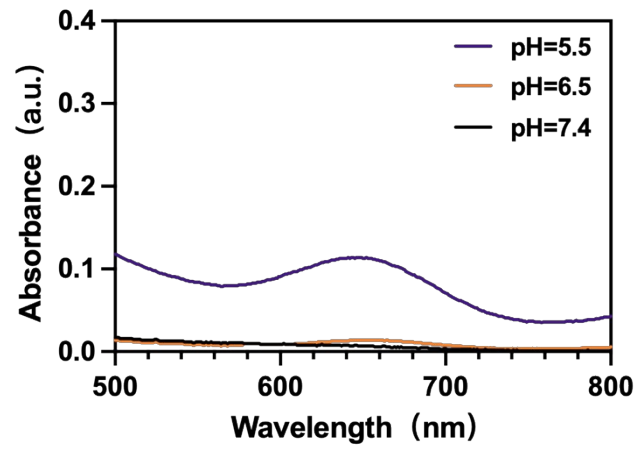

**Figure S6.** UV-Vis absorption spectra of Fe<sub>3</sub>O<sub>4</sub>-Hb@cur and TMB at different pH values.

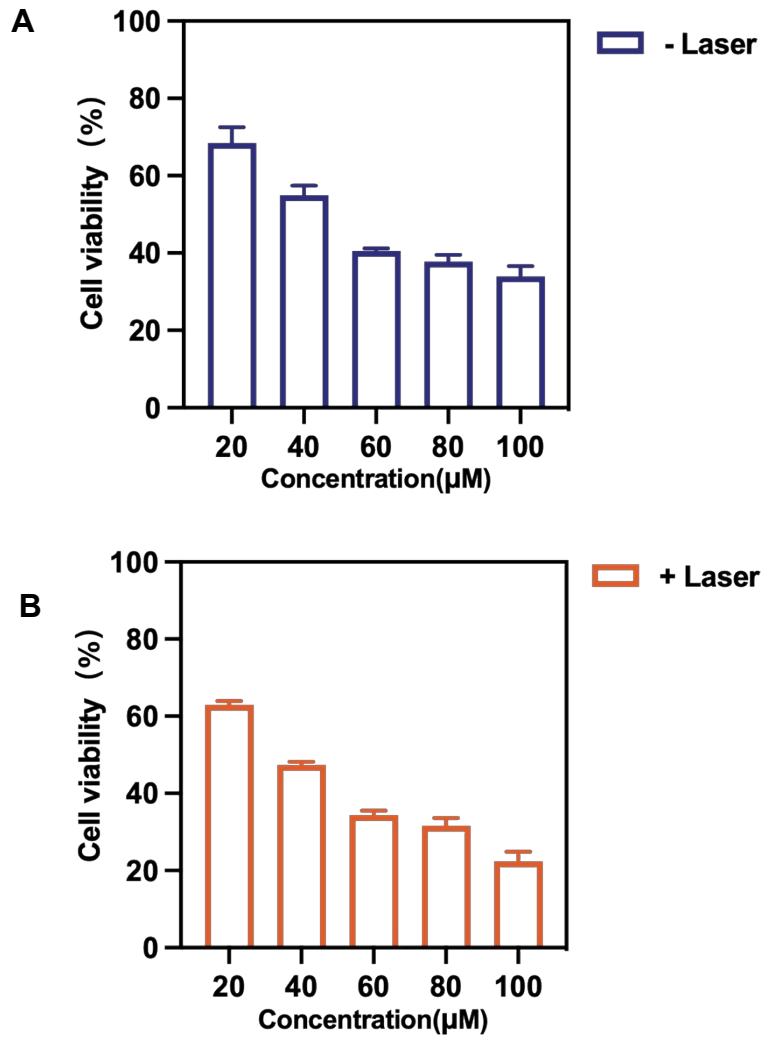

**Figure S7.** Cytotoxicity of different concentrations of  $\text{Fe}_3\text{O}_4\text{-Hb@cur}$ , against 4T1 cells in the dark (A) and after 30 seconds of laser irradiation (B).



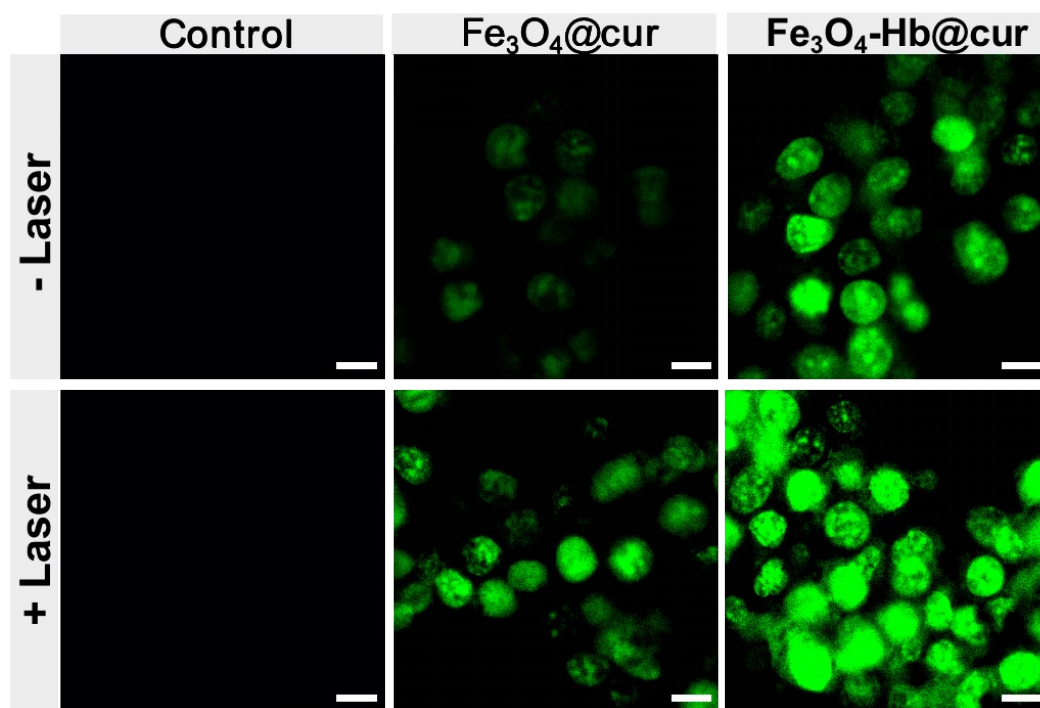

**Figure S8.** Detection of ROS levels after different treatments in DCFH-DA-stained 4T1 cells for 12 h. Scale bar: 10 nm.

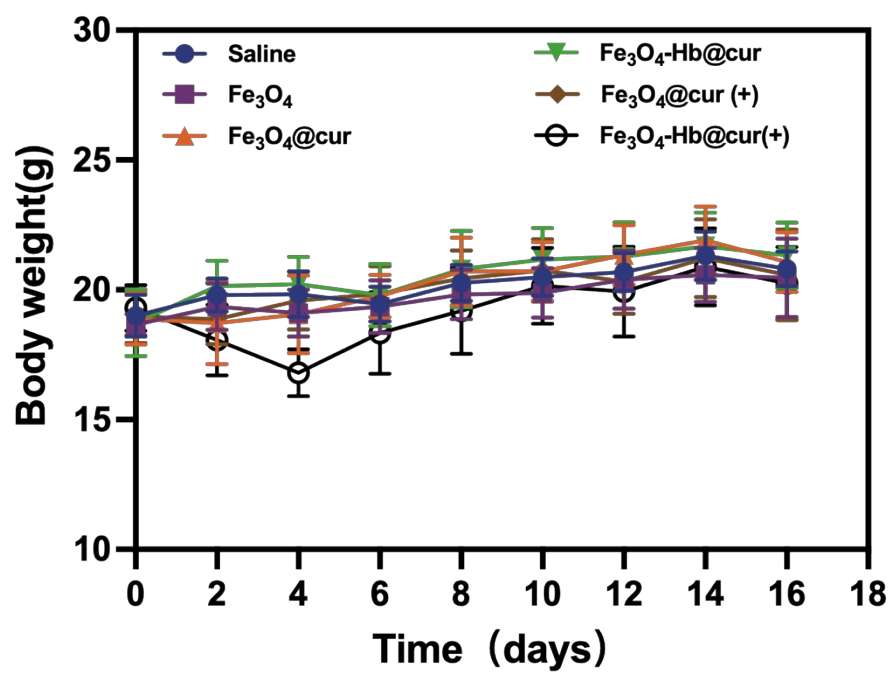

Figure S9. Body weight changes of the mice treated with different samples.
